# Supplementary material
Source: publisher figshare collection journal article supplement (https://acs.figshare.com/ndownloader/files/4270438)
Supplement: Supplementary file 1 [file 4270438]

## Supporting Information

# Preparation of Highly Conductive Graphene Hydrogels for Fabricating Supercapacitors with High Rate Capability

Li Zhang, Gaoquan Shi\*

Department of Chemistry, Tsinghua University, Beijing 100084, People's Republic of China

**Table S1.** Elemental analysis results of GHs.

| GH     | C wt. % | H wt. % | N wt. % | O wt. % |
|--------|---------|---------|---------|---------|
| GH-H   | 78.06   | 0.64    | 0.27    | 21.03   |
| GH-HI3 | 80.27   | 0.56    | 0.26    | 16.35   |
| GH-Hz3 | 78.46   | 0.67    | 2.99    | 17.88   |
| GH-HI8 | 81.05   | 0.58    | 0.31    | 16.12   |
| GH-Hz8 | 79.32   | 0.76    | 2.54    | 17.38   |

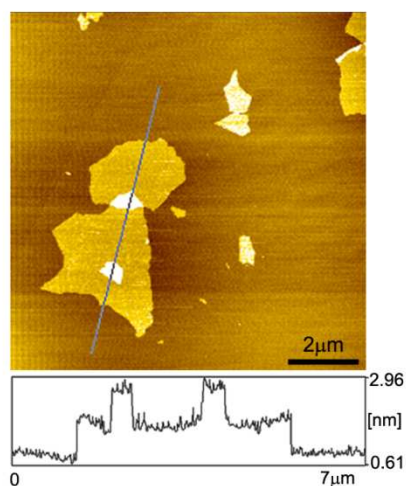

**Figure S1.** AFM image of GO sheets on mica.

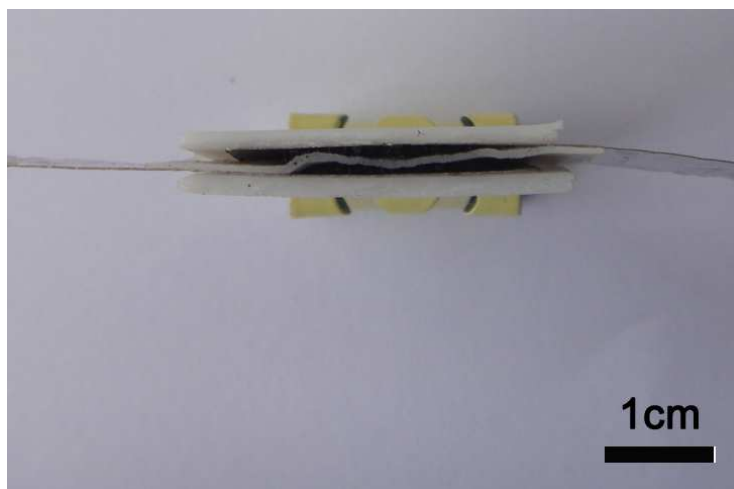

**Figure S2.** Photograph of a two-electrode test cell.

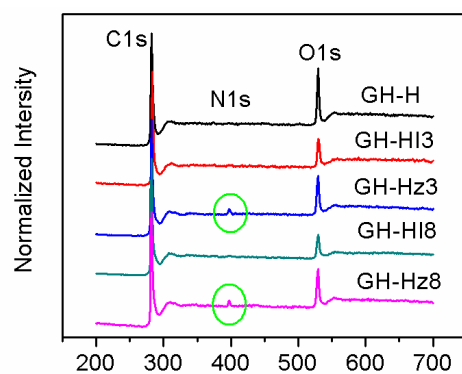

**Figure S3.** Survey scanned XPS spectra of GHs with a pass energy of 200 eV. The N1s peaks at 397 eV are shown in the spectra of Hz-reduced samples.
